# Supplementary material
Source: publisher figshare collection journal article supplement (https://diabetesjournals.figshare.com/ndownloader/files/34051781)
Supplement: Supplementary file 1 [file 34051781]

Supplementary table 1 Definition of health conditions

| Health condition            | ICPC-2         | ICD-9-CM                        | Others                   |
|-----------------------------|----------------|---------------------------------|--------------------------|
| Type II diabetes mellitus   | T90            | NA                              | NA                       |
| Cardiovascular diseases     | K74-77, K89-91 | 410.x-414.x, 428.x, 430.x-438.x | NA                       |
| Coronary heart disease      | K74-76         | 410.x-414.x                     | NA                       |
| Stroke                      | K89-91         | 430.x-438.x                     | NA                       |
| Heart failure               | K77            | 428.x                           | NA                       |
| Peripheral vascular disease | K92            | 250.6x, 440.2x, 997.2, 997.6x   | NA                       |
| All-cause mortality         | NA             | NA                              | Hong Kong Death Registry |

ICPC-2 = International Classification of Primary Care, 2nd edition; ICD-9-CM = International Classification of Diseases, Ninth Revision, Clinical Modification

Supplementary table 2. Calculations of continuity of care measures

| Measure                                   | Formula                                                                                                                                                                                                                                                                                                                     |
|-------------------------------------------|-----------------------------------------------------------------------------------------------------------------------------------------------------------------------------------------------------------------------------------------------------------------------------------------------------------------------------|
| Usual provider continuity index (UPCI)    | $UPCI = \frac{n_{max}}{N}$ <p> <math>n_{max}</math> = the number of visits given by the most frequently visited team<br/> <math>N</math> = the total number of visits of the patient </p>                                                                                                                                   |
| Continuity of care index (COCI)           | $COCI = \frac{\sum_{i=1}^k n_i^2 - N}{N(N-1)}$ <p> <math>k</math> = number of teams<br/> <math>n_i</math> = number of visits to team <math>i</math><br/> <math>N</math> = total number of visits of the patient </p>                                                                                                        |
| Modified modified continuity index (MMCI) | $MMCI = \frac{1 - \frac{k}{N + 0.1}}{1 - \frac{1}{N + 0.1}}$ <p> <math>k</math> = number of teams<br/> <math>N</math> = total number of visits of the patient </p>                                                                                                                                                          |
| Sequential continuity index (SECON)       | $SECON = \frac{\varphi_i + \dots + \varphi_{N-1}}{N-1}$ <p> <math>\varphi = 1</math> when current and the subsequent visits are given by the same team<br/> <math>\varphi = 0</math> when current and the subsequent visits are given by the same team<br/> <math>N</math> = the total number of visits of the patient </p> |

Supplementary table 3. Data completion rate of baseline characteristics

|                                      | Baseline         |
|--------------------------------------|------------------|
|                                      | Total = 312,167  |
| Age                                  | 312,167 (100.0%) |
| Sex                                  | 312,167 (100.0%) |
| Smoker                               | 312,167 (100.0%) |
| Body mass index                      | 264,509 (84.7%)  |
| Systolic blood pressure              | 311,562 (99.8%)  |
| Diastolic blood pressure             | 311,563 (99.8%)  |
| Haemoglobin A1c                      | 301,479 (96.6%)  |
| Low-density lipoprotein              | 269,306 (86.3%)  |
| Estimated glomerular filtration rate | 287,188 (92.0%)  |
| Charlson's index                     | 312,167 (100.0%) |
| Use of anti-diabetic drugs           | 312,167 (100.0%) |
| Use of anti-hypertensive drugs       | 312,167 (100.0%) |
| Use of lipid-lowering agents         | 312,167 (100.0%) |
| Number of attendances                | 312,167 (100.0%) |

Supplementary table 4a Baseline characteristics by team-based UPCI quartiles after multiple imputation and weighting with complete case only

|                                 | 1 <sup>st</sup> quartile<br>UPCI <0.50<br>(N = 50,060) | 2 <sup>nd</sup> quartile<br>UPCI 0.50-0.72<br>(N = 72,273) | 3 <sup>rd</sup> quartile<br>UPCI 0.73-0.91<br>(N = 60,335) | 4 <sup>th</sup> quartile<br>UPCI 0.92-1.0<br>(N = 63,716) | SMD   |
|---------------------------------|--------------------------------------------------------|------------------------------------------------------------|------------------------------------------------------------|-----------------------------------------------------------|-------|
| Male                            | 23,302 (46.5%)                                         | 33,271 (46.0%)                                             | 27,821 (46.1%)                                             | 29,456 (46.2%)                                            | 0.01  |
| Age, year                       | 62.5 (11.2)                                            | 62.7 (11.3)                                                | 62.7 (11.3)                                                | 62.8 (11.1)                                               | 0.03  |
| Smoker                          | 3,333 (6.7%)                                           | 4,647 (6.4%)                                               | 4,057 (6.7%)                                               | 4,459 (7.0%)                                              | 0.02  |
| SBP, mmHg                       | 133.8 (17.0)                                           | 133.7 (16.6)                                               | 133.7 (16.5)                                               | 133.9 (16.4)                                              | <0.01 |
| DBP, mmHg                       | 75.1 (10.3)                                            | 74.9 (10.2)                                                | 74.9 (9.9)                                                 | 74.9 (9.8)                                                | 0.02  |
| HbA1c, %                        | 7.1 (1.2)                                              | 7.1 (1.2)                                                  | 7.1 (1.2)                                                  | 7.1 (1.2)                                                 | 0.02  |
| HbA1c, mmol/mol                 | 54.5 (13.6)                                            | 54.3 (13.0)                                                | 54.3 (12.9)                                                | 54.5 (12.8)                                               | 0.02  |
| BMI, kg/m <sup>2</sup>          | 25.8 (4.0)                                             | 25.8 (4.1)                                                 | 25.8 (4.1)                                                 | 25.7 (4.0)                                                | <0.01 |
| LDL-C, mmol/L                   | 2.8 (0.8)                                              | 2.8 (0.8)                                                  | 2.8 (0.8)                                                  | 2.8 (0.8)                                                 | 0.01  |
| eGFR, ml/min/1.73m <sup>2</sup> | 105.9 (28.3)                                           | 104.9 (29.1)                                               | 104.9 (29.8)                                               | 104.7 (35.4)                                              | 0.04  |
| Charlson comorbidity index      | 3.8 (1.2)                                              | 3.8 (1.2)                                                  | 3.8 (1.2)                                                  | 3.8 (1.2)                                                 | 0.02  |
| Use of anti-diabetic drugs      | 41,191 (82.3%)                                         | 59,400 (82.2%)                                             | 49,766 (82.5%)                                             | 52,748 (82.8%)                                            | 0.02  |
| Use of anti-hypertensive drugs  | 36,579 (73.1%)                                         | 53,728 (74.3%)                                             | 44,562 (73.9%)                                             | 46,562 (73.1%)                                            | 0.03  |
| Use of lipid-lowering agents    | 14,955 (29.9%)                                         | 22,075 (30.5%)                                             | 18,310 (30.3%)                                             | 19,027 (29.9%)                                            | 0.01  |
| Number of attendances           | 12 (5.2)                                               | 12 (4.6)                                                   | 12 (4.2)                                                   | 12 (4.4)                                                  | 0.03  |
| Usual provider continuity index | 0.37 (0.08)                                            | 0.61 (0.07)                                                | 0.84 (0.06)                                                | 0.99 (0.02)                                               | NA    |

The values are presented as mean (SD) or number (%), as appropriate.

The groups were adjusted with fine stratification weights with propensity score generated by multivariable logistic regression adjusted with the listed parameters except UPCI

The SMD listed is the largest SMD between any pairs of the quartiles. A SMD less than 0.2 indicates sufficient balance for the characteristic

UPCI = Usual provider continuity index; SMD = Standardized mean difference; SBP = Systolic blood pressure; DBP = Diastolic blood pressure; HbA1c = Haemoglobin A1c; BMI = Body mass index; LDL-C = Low density lipoprotein - cholesterol; eGFR = Estimated glomerular filtration rate; NA = Not applicable

Supplementary table 4b Baseline characteristics by team-based UPCI quartiles after multiple imputation and weighting with at least three years of follow-up

|                                 | 1 <sup>st</sup> quartile<br>UPCI <0.50<br>(N = 50,787) | 2 <sup>nd</sup> quartile<br>UPCI 0.50-0.74<br>(N = 71,812) | 3 <sup>rd</sup> quartile<br>UPCI 0.75-0.91<br>(N = 60,650) | 4 <sup>th</sup> quartile<br>UPCI 0.92-1.0<br>(N = 63,911) | SMD  |
|---------------------------------|--------------------------------------------------------|------------------------------------------------------------|------------------------------------------------------------|-----------------------------------------------------------|------|
| Male                            | 24,587 (48.4%)                                         | 34,344 (47.8%)                                             | 29,118 (48.0%)                                             | 30,723 (48.1%)                                            | 0.01 |
| Age, year                       | 62.4 (11.2)                                            | 62.7 (11.2)                                                | 62.6 (11.2)                                                | 62.8 (11.1)                                               | 0.04 |
| Smoker                          | 3,551 (7.0%)                                           | 4,899 (6.8%)                                               | 4,251 (7.0%)                                               | 4,615 (7.2%)                                              | 0.02 |
| SBP, mmHg                       | 132.6 (16.4)                                           | 132.5 (16.2)                                               | 132.5 (16.0)                                               | 132.7 (15.9)                                              | 0.01 |
| DBP, mmHg                       | 75.0 (10.3)                                            | 74.8 (10.1)                                                | 74.9 (9.8)                                                 | 74.8 (9.7)                                                | 0.02 |
| HbA1c, %                        | 7.0 (1.2)                                              | 7.0 (1.1)                                                  | 7.0 (1.1)                                                  | 7.0 (1.1)                                                 | 0.03 |
| HbA1c, mmol/mol                 | 53.5 (12.9)                                            | 53.2 (12.4)                                                | 53.3 (12.3)                                                | 53.5 (12.2)                                               | 0.03 |
| BMI, kg/m <sup>2</sup>          | 25.9 (4.1)                                             | 25.9 (4.1)                                                 | 25.9 (4.1)                                                 | 25.8 (4.1)                                                | 0.01 |
| LDL-C, mmol/L                   | 2.7 (0.8)                                              | 2.7 (0.8)                                                  | 2.7 (0.8)                                                  | 2.7 (0.8)                                                 | 0.02 |
| eGFR, ml/min/1.73m <sup>2</sup> | 106.7 (28.2)                                           | 105.8 (27.2)                                               | 105.7 (29.4)                                               | 106.7 (70.6)                                              | 0.03 |
| Charlson comorbidity index      | 3.8 (1.2)                                              | 3.8 (1.2)                                                  | 3.8 (1.2)                                                  | 3.8 (1.2)                                                 | 0.02 |
| Use of anti-diabetic drugs      | 41,262 (81.2%)                                         | 58,142 (81.0%)                                             | 49,245 (81.2%)                                             | 52,165 (81.6%)                                            | 0.02 |
| Use of anti-hypertensive drugs  | 37,525 (73.9%)                                         | 54,007 (75.2%)                                             | 45,347 (74.8%)                                             | 47,315 (74.0%)                                            | 0.03 |
| Use of lipid-lowering agents    | 20,926 (41.2%)                                         | 30,445 (42.4%)                                             | 25,449 (42.0%)                                             | 26,340 (41.2%)                                            | 0.02 |
| Number of attendances           | 12 (5.1)                                               | 12 (4.6)                                                   | 12 (4.2)                                                   | 12 (4.5)                                                  | 0.02 |
| Usual provider continuity index | 0.36 (0.08)                                            | 0.60 (0.07)                                                | 0.84 (0.06)                                                | 0.99 (0.02)                                               | NA   |

The values are presented as mean (SD) or number (%), as appropriate.

The groups were adjusted with fine stratification weights with propensity score generated by multivariable logistic regression adjusted with the listed parameters except UPCI

The SMD listed is the largest SMD between any pairs of the quartiles. A SMD less than 0.2 indicates sufficient balance for the characteristic

UPCI = Usual provider continuity index; SMD = Standardized mean difference; SBP = Systolic blood pressure; DBP = Diastolic blood pressure; HbA1c = Haemoglobin A1c; BMI = Body mass index; LDL-C = Low density lipoprotein - cholesterol; eGFR = Estimated glomerular filtration rate; NA = Not applicable

Supplementary table 4c Baseline characteristics by team-based COCI quartiles after multiple imputation and weighting

|                                 | 1 <sup>st</sup> quartile<br>COCI <0.32<br>(N = 77,906) | 2 <sup>nd</sup> quartile<br>COCI 0.32-0.54<br>(N = 78,044) | 3 <sup>rd</sup> quartile<br>COCI 0.55-0.84<br>(N = 75,799) | 4 <sup>th</sup> quartile<br>COCI 0.85-1.0<br>(N = 80,304) | SMD  |
|---------------------------------|--------------------------------------------------------|------------------------------------------------------------|------------------------------------------------------------|-----------------------------------------------------------|------|
| Male                            | 37,099 (47.6%)                                         | 36,585 (46.9%)                                             | 35,888 (47.3%)                                             | 37,819 (47.1%)                                            | 0.01 |
| Age, year                       | 63.1 (11.4)                                            | 63.4 (11.5)                                                | 63.2 (11.5)                                                | 63.6 (11.3)                                               | 0.04 |
| Smoker                          | 5,048 (6.5%)                                           | 4,920 (6.3%)                                               | 5,030 (6.6%)                                               | 5,481 (6.8%)                                              | 0.02 |
| SBP, mmHg                       | 133.6 (17.0)                                           | 133.4 (16.6)                                               | 133.5 (16.5)                                               | 133.7 (16.4)                                              | 0.02 |
| DBP, mmHg                       | 74.9 (10.4)                                            | 74.7 (10.2)                                                | 74.7 (10.0)                                                | 74.6 (9.9)                                                | 0.03 |
| HbA1c, %                        | 7.1 (1.2)                                              | 7.1 (1.2)                                                  | 7.1 (1.2)                                                  | 7.1 (1.2)                                                 | 0.03 |
| HbA1c, mmol/mol                 | 54.1 (13.5)                                            | 53.8 (12.9)                                                | 54.0 (12.8)                                                | 54.2 (12.7)                                               | 0.03 |
| BMI, kg/m <sup>2</sup>          | 25.8 (4.1)                                             | 25.8 (4.1)                                                 | 25.8 (4.1)                                                 | 25.8 (4.0)                                                | 0.01 |
| LDL-C, mmol/L                   | 2.8 (0.8)                                              | 2.8 (0.8)                                                  | 2.8 (0.8)                                                  | 2.8 (0.9)                                                 | 0.02 |
| eGFR, ml/min/1.73m <sup>2</sup> | 105.1 (29.5)                                           | 104.4 (40.3)                                               | 104.4 (33.1)                                               | 104.4 (44.9)                                              | 0.02 |
| Charlson comorbidity index      | 3.9 (1.2)                                              | 3.9 (1.2)                                                  | 3.9 (1.2)                                                  | 3.9 (1.2)                                                 | 0.02 |
| Use of anti-diabetic drugs      | 63,457 (81.5%)                                         | 63,277 (81.1%)                                             | 61,623 (81.3%)                                             | 65,745 (81.9%)                                            | 0.02 |
| Use of anti-hypertensive drugs  | 57,963 (74.4%)                                         | 58,780 (75.3%)                                             | 56,480 (74.5%)                                             | 59,471 (74.1%)                                            | 0.03 |
| Use of lipid-lowering agents    | 27,365 (35.1%)                                         | 27,813 (35.6%)                                             | 26,499 (35.0%)                                             | 27,471 (34.2%)                                            | 0.03 |
| Number of attendances           | 12 (5.4)                                               | 12 (4.5)                                                   | 12 (4.0)                                                   | 12 (4.5)                                                  | 0.04 |
| Continuity of care index        | 0.20 (0.08)                                            | 0.43 (0.06)                                                | 0.71 (0.09)                                                | 0.98 (0.04)                                               | NA   |

The values are presented as mean (SD) or number (%), as appropriate.

The groups were adjusted with fine stratification weights with propensity score generated by multivariable logistic regression adjusted with the listed parameters except COCI

The SMD listed is the largest SMD between any pairs of the quartiles. A SMD less than 0.2 indicates sufficient balance for the characteristic

COCI = Continuity of care index; SMD = Standardized mean difference; SBP = Systolic blood pressure; DBP = Diastolic blood pressure; HbA1c = Haemoglobin A1c; BMI = Body mass index; LDL-C = Low density lipoprotein - cholesterol; eGFR = Estimated glomerular filtration rate; NA = Not applicable

Supplementary table 4d Baseline characteristics by team-based MMCI quartiles after multiple imputation and weighting

|                                    | 1 <sup>st</sup> quartile<br>MMCI <0.72<br>(N = 77,337) | 2 <sup>nd</sup> quartile<br>MMCI 0.72-0.83<br>(N = 73,440) | 3 <sup>rd</sup> quartile<br>MMCI 0.84-0.92<br>(N = 81,177) | 4 <sup>th</sup> quartile<br>MMCI 0.93-1.0<br>(N = 79,441) | SMD  |
|------------------------------------|--------------------------------------------------------|------------------------------------------------------------|------------------------------------------------------------|-----------------------------------------------------------|------|
| Male                               | 36,794 (47.6%)                                         | 34,268 (46.7%)                                             | 38,331 (47.2%)                                             | 37,302 (47.0%)                                            | 0.02 |
| Age, year                          | 63.1 (11.5)                                            | 63.7 (11.6)                                                | 63.1 (11.7)                                                | 63.6 (11.3)                                               | 0.06 |
| Smoker                             | 5,067 (6.6%)                                           | 4,652 (6.3%)                                               | 5,340 (6.6%)                                               | 5,244 (6.6%)                                              | 0.01 |
| SBP, mmHg                          | 133.2 (16.8)                                           | 133.6 (16.6)                                               | 133.3 (16.4)                                               | 133.7 (16.4)                                              | 0.03 |
| DBP, mmHg                          | 74.8 (10.4)                                            | 74.5 (10.2)                                                | 74.7 (10.0)                                                | 74.6 (9.9)                                                | 0.02 |
| HbA1c, %                           | 7.1 (1.2)                                              | 7.1 (1.2)                                                  | 7.1 (1.1)                                                  | 7.1 (1.2)                                                 | 0.03 |
| HbA1c, mmol/mol                    | 53.7 (13.2)                                            | 54.0 (13.2)                                                | 53.8 (12.5)                                                | 54.1 (12.6)                                               | 0.03 |
| BMI, kg/m <sup>2</sup>             | 25.8 (4.1)                                             | 25.8 (4.1)                                                 | 25.8 (4.1)                                                 | 25.8 (4.0)                                                | 0.02 |
| LDL-C, mmol/L                      | 2.7 (0.8)                                              | 2.8 (0.8)                                                  | 2.8 (0.8)                                                  | 2.8 (0.9)                                                 | 0.04 |
| eGFR, ml/min/1.73m <sup>2</sup>    | 105.4 (29.1)                                           | 104.1 (31.0)                                               | 104.4 (31.6)                                               | 104.5 (69.5)                                              | 0.05 |
| Charlson comorbidity index         | 3.9 (1.2)                                              | 3.9 (1.2)                                                  | 3.9 (1.2)                                                  | 3.9 (1.2)                                                 | 0.04 |
| Use of anti-diabetic drugs         | 63,016 (81.5%)                                         | 58,946 (80.3%)                                             | 65,569 (80.8%)                                             | 65,053 (81.9%)                                            | 0.04 |
| Use of anti-hypertensive drugs     | 58,011 (75.0%)                                         | 55,654 (75.8%)                                             | 59,969 (73.9%)                                             | 59,242 (74.6%)                                            | 0.04 |
| Use of lipid-lowering agents       | 28,596 (37.0%)                                         | 26,184 (35.7%)                                             | 29,356 (36.2%)                                             | 27,298 (34.4%)                                            | 0.05 |
| Number of attendances              | 12 (5.7)                                               | 12 (4.8)                                                   | 12 (4.5)                                                   | 12 (4.9)                                                  | 0.04 |
| Modified modified continuity index | 0.58 (0.14)                                            | 0.79 (0.03)                                                | 0.89 (0.02)                                                | 0.99 (0.02)                                               | NA   |

The values are presented as mean (SD) or number (%), as appropriate.

The groups were adjusted with fine stratification weights with propensity score generated by multivariable logistic regression adjusted with the listed parameters except MMCI

The SMD listed is the largest SMD between any pairs of the quartiles. A SMD less than 0.2 indicates sufficient balance for the characteristic

MMCI = Modified modified continuity index; SMD = Standardized mean difference; SBP = Systolic blood pressure; DBP = Diastolic blood pressure; HbA1c = Haemoglobin A1c; BMI = Body mass index; LDL-C = Low density lipoprotein - cholesterol; eGFR = Estimated glomerular filtration rate; NA = Not applicable

Supplementary table 4e Baseline characteristics by team-based SECON after multiple imputation and weighting

|                                 | 1 <sup>st</sup> quartile<br>SECON <0.50<br>(N = 74,865) | 2 <sup>nd</sup> quartile<br>SECON 0.50-0.72<br>(N = 80,953) | 3 <sup>rd</sup> quartile<br>SECON 0.73-0.90<br>(N = 76,152) | 4 <sup>th</sup> quartile<br>SECON 0.91-1.0<br>(N = 80,038) | SMD  |
|---------------------------------|---------------------------------------------------------|-------------------------------------------------------------|-------------------------------------------------------------|------------------------------------------------------------|------|
| Male                            | 35,872 (47.9%)                                          | 38,058 (47.0%)                                              | 35,706 (46.9%)                                              | 37,737 (47.1%)                                             | 0.02 |
| Age, year                       | 62.9 (11.4)                                             | 63.4 (11.6)                                                 | 63.3 (11.4)                                                 | 63.5 (11.4)                                                | 0.06 |
| Smoker                          | 4,984 (6.7%)                                            | 5,114 (6.3%)                                                | 4,922 (6.5%)                                                | 5,467 (6.8%)                                               | 0.02 |
| SBP, mmHg                       | 133.5 (16.9)                                            | 133.5 (16.6)                                                | 133.5 (16.6)                                                | 133.7 (16.4)                                               | 0.01 |
| DBP, mmHg                       | 74.9 (10.5)                                             | 74.7 (10.2)                                                 | 74.6 (10.0)                                                 | 74.7 (9.9)                                                 | 0.03 |
| HbA1c, %                        | 7.1 (1.3)                                               | 7.1 (1.2)                                                   | 7.1 (1.2)                                                   | 7.1 (1.2)                                                  | 0.03 |
| HbA1c, mmol./mol                | 54.2 (13.7)                                             | 53.8 (12.9)                                                 | 54.0 (12.8)                                                 | 54.2 (12.8)                                                | 0.03 |
| BMI, kg/m <sup>2</sup>          | 25.8 (4.1)                                              | 25.8 (4.1)                                                  | 25.8 (4.1)                                                  | 25.8 (4.1)                                                 | 0.01 |
| LDL-C, mmol/L                   | 2.8 (0.8)                                               | 2.8 (0.8)                                                   | 2.8 (0.8)                                                   | 2.8 (0.9)                                                  | 0.02 |
| eGFR, ml/min/1.73m <sup>2</sup> | 105.5 (33.2)                                            | 104.3 (28.3)                                                | 104.4 (64.6)                                                | 104.9 (65.1)                                               | 0.04 |
| Charlson comorbidity index      | 3.9 (1.2)                                               | 3.9 (1.2)                                                   | 3.9 (1.2)                                                   | 3.9 (1.2)                                                  | 0.04 |
| Use of anti-diabetic drugs      | 60,889 (81.3%)                                          | 65,399 (80.8%)                                              | 61,912 (81.3%)                                              | 65,493 (81.8%)                                             | 0.03 |
| Use of anti-hypertensive drugs  | 55,210 (73.7%)                                          | 61,188 (75.6%)                                              | 57,056 (74.9%)                                              | 59,113 (73.9%)                                             | 0.04 |
| Use of lipid-lowering agents    | 26,183 (35.0%)                                          | 28,871 (35.7%)                                              | 26,741 (35.1%)                                              | 27,455 (34.3%)                                             | 0.03 |
| Number of attendances           | 12 (5.3)                                                | 12 (4.4)                                                    | 12 (4.2)                                                    | 12 (4.5)                                                   | 0.05 |
| Sequential continuity index     | 0.28 (0.14)                                             | 0.61 (0.08)                                                 | 0.83 (0.05)                                                 | 0.99 (0.02)                                                | NA   |

The values are presented as mean (SD) or number (%), as appropriate.

The groups were adjusted with fine stratification weights with propensity score generated by multivariable logistic regression adjusted with the listed parameters except SECON

The SMD listed is the largest SMD between any pairs of the quartiles. A SMD less than 0.2 indicates sufficient balance for the characteristic

SECON = Sequential continuity index; SMD = Standardized mean difference; SBP = Systolic blood pressure; DBP = Diastolic blood pressure; HbA1c = Haemoglobin A1c; BMI = Body mass index; LDL-C = Low density lipoprotein - cholesterol; eGFR = Estimated glomerular filtration rate; NA = Not applicable



Supplementary table 4f Baseline characteristics by team-based UPCI quartiles after multiple imputation and weighting of patients with at least five attended medical consultations

|                                 | 1 <sup>st</sup> quartile<br>UPCI <0.51<br>(N = 76,350) | 2 <sup>nd</sup> quartile<br>UPCI 0.51-0.74<br>(N = 73,982) | 3 <sup>rd</sup> quartile<br>UPCI 0.75-0.92<br>(N = 78,355) | 4 <sup>th</sup> quartile<br>UPCI 0.93-1.0<br>(N = 76,937) | SMD   |
|---------------------------------|--------------------------------------------------------|------------------------------------------------------------|------------------------------------------------------------|-----------------------------------------------------------|-------|
| Male                            | 36,217 (47.4%)                                         | 34,572 (46.7%)                                             | 36,770 (46.9%)                                             | 36,078 (46.9%)                                            | 0.01  |
| Age, year                       | 63.2 (11.5)                                            | 63.5 (11.5)                                                | 63.4 (11.4)                                                | 63.7 (11.2)                                               | 0.04  |
| Smoker                          | 4,990 (6.5%)                                           | 4,678 (6.3%)                                               | 5,161 (6.6%)                                               | 5,142 (6.7%)                                              | 0.01  |
| SBP, mmHg                       | 133.5 (16.9)                                           | 133.5 (16.5)                                               | 133.5 (16.5)                                               | 133.7 (16.3)                                              | 0.02  |
| DBP, mmHg                       | 74.8 (10.3)                                            | 74.6 (10.2)                                                | 74.6 (10.0)                                                | 74.6 (9.9)                                                | 0.02  |
| HbA1c, %                        | 7.1 (1.2)                                              | 7.1 (1.2)                                                  | 7.1 (1.2)                                                  | 7.1 (1.1)                                                 | 0.02  |
| HbA1c, mmol/mol                 | 54.0 (13.3)                                            | 53.8 (12.8)                                                | 53.9 (12.6)                                                | 54.1 (12.6)                                               | 0.02  |
| BMI, kg/m <sup>2</sup>          | 25.8 (4.1)                                             | 25.8 (4.1)                                                 | 25.8 (4.1)                                                 | 25.8 (4.0)                                                | <0.01 |
| LDL-C, mmol/L                   | 2.8 (0.8)                                              | 2.8 (0.8)                                                  | 2.8 (0.8)                                                  | 2.8 (0.9)                                                 | 0.02  |
| eGFR, ml/min/1.73m <sup>2</sup> | 105.0 (29.3)                                           | 104.2 (40.2)                                               | 104.2 (33.5)                                               | 104.2 (45.4)                                              | 0.02  |
| Charlson comorbidity index      | 3.9 (1.2)                                              | 3.9 (1.2)                                                  | 3.9 (1.2)                                                  | 3.9 (1.2)                                                 | 0.03  |
| Use of anti-diabetic drugs      | 62,461 (81.8%)                                         | 60,367 (81.6%)                                             | 64,160 (81.9%)                                             | 63,290 (82.3%)                                            | 0.02  |
| Use of anti-hypertensive drugs  | 57,153 (74.9%)                                         | 56,186 (75.9%)                                             | 59,096 (75.4%)                                             | 57,881 (75.2%)                                            | 0.03  |
| Use of lipid-lowering agents    | 26,607 (34.8%)                                         | 26,237 (35.5%)                                             | 27,405 (35.0%)                                             | 26,295 (34.2%)                                            | 0.03  |
| Number of attendances           | 12 (4.9)                                               | 12 (4.4)                                                   | 12 (4.2)                                                   | 12 (4.5)                                                  | 0.03  |
| Usual provider continuity index | 0.40 (0.09)                                            | 0.63 (0.06)                                                | 0.84 (0.06)                                                | 0.99 (0.02)                                               | NA    |

The values are presented as mean (SD) or number (%), as appropriate.

The groups were adjusted with fine stratification weights with propensity score generated by multivariable logistic regression adjusted with the listed parameters except UPCI

The SMD listed is the largest SMD between any pairs of the quartiles. A SMD less than 0.2 indicates sufficient balance for the characteristic

UPCI = Usual provider continuity index; SMD = Standardized mean difference; SBP = Systolic blood pressure; DBP = Diastolic blood pressure; HbA1c = Haemoglobin A1c; BMI = Body mass index; LDL-C = Low density lipoprotein - cholesterol; eGFR = Estimated glomerular filtration rate; NA = Not applicable

Supplementary table 4g Baseline characteristics by team-based UPCI quartiles after multiple imputation and weighting of patients with at least eight attended medical consultations

|                                 | 1 <sup>st</sup> quartile<br>UPCI <0.50<br>(N = 56,243) | 2 <sup>nd</sup> quartile<br>UPCI 0.50-0.74<br>(N = 81,827) | 3 <sup>rd</sup> quartile<br>UPCI 0.75-0.91<br>(N = 68,727) | 4 <sup>th</sup> quartile<br>UPCI 0.92-1.0<br>(N = 72,644) | SMD   |
|---------------------------------|--------------------------------------------------------|------------------------------------------------------------|------------------------------------------------------------|-----------------------------------------------------------|-------|
| Male                            | 26,055 (46.3%)                                         | 37,796 (46.2%)                                             | 31,878 (46.4%)                                             | 33,874 (46.6%)                                            | <0.01 |
| Age, year                       | 63.7 (11.5)                                            | 63.8 (11.4)                                                | 63.7 (11.4)                                                | 63.8 (11.2)                                               | 0.01  |
| Smoker                          | 3,667 (6.5%)                                           | 5,239 (6.4%)                                               | 4,455 (6.5%)                                               | 4,986 (6.9%)                                              | 0.02  |
| SBP, mmHg                       | 133.8 (16.8)                                           | 133.7 (16.5)                                               | 133.7 (16.5)                                               | 133.7 (16.3)                                              | <0.01 |
| DBP, mmHg                       | 74.6 (10.3)                                            | 74.5 (10.2)                                                | 74.5 (10.0)                                                | 74.5 (9.9)                                                | <0.01 |
| HbA1c, %                        | 7.1 (1.2)                                              | 7.1 (1.2)                                                  | 7.1 (1.1)                                                  | 7.1 (1.1)                                                 | 0.01  |
| HbA1c, mmol/mol                 | 53.9 (13.1)                                            | 53.8 (12.7)                                                | 53.9 (12.5)                                                | 54.0 (12.4)                                               | 0.01  |
| BMI, kg/m <sup>2</sup>          | 25.8 (4.1)                                             | 25.8 (4.1)                                                 | 25.8 (4.1)                                                 | 25.8 (4.0)                                                | <0.01 |
| LDL-C, mmol/L                   | 2.8 (0.8)                                              | 2.8 (0.8)                                                  | 2.8 (0.8)                                                  | 2.8 (0.9)                                                 | 0.01  |
| eGFR, ml/min/1.73m <sup>2</sup> | 104.3 (28.9)                                           | 103.9 (43.2)                                               | 104.1 (66.9)                                               | 104.6 (68.0)                                              | 0.01  |
| Charlson comorbidity index      | 3.9 (1.2)                                              | 3.9 (1.2)                                                  | 3.9 (1.2)                                                  | 3.9 (1.2)                                                 | <0.01 |
| Use of anti-diabetic drugs      | 46,613 (82.9%)                                         | 67,531 (82.5%)                                             | 56,836 (82.7%)                                             | 60,159 (82.8%)                                            | <0.01 |
| Use of anti-hypertensive drugs  | 42,928 (76.3%)                                         | 62,811 (76.8%)                                             | 52,690 (76.7%)                                             | 55,352 (76.2%)                                            | 0.01  |
| Use of lipid-lowering agents    | 18,633 (33.1%)                                         | 27,675 (33.8%)                                             | 22,912 (33.3%)                                             | 24,447 (33.7%)                                            | 0.01  |
| Number of attendances           | 13 (4.6)                                               | 13 (4.3)                                                   | 13 (4.3)                                                   | 13 (4.3)                                                  | 0.02  |
| Usual provider continuity index | 0.37 (0.08)                                            | 0.61 (0.07)                                                | 0.84 (0.05)                                                | 0.99 (0.03)                                               | NA    |

The values are presented as mean (SD) or number (%), as appropriate.

The groups were adjusted with fine stratification weights with propensity score generated by multivariable logistic regression adjusted with the listed parameters except UPCI

The SMD listed is the largest SMD between any pairs of the quartiles. A SMD less than 0.2 indicates sufficient balance for the characteristic

UPCI = Usual provider continuity index; SMD = Standardized mean difference; SBP = Systolic blood pressure; DBP = Diastolic blood pressure; HbA1c = Haemoglobin A1c; BMI = Body mass index; LDL-C = Low density lipoprotein - cholesterol; eGFR = Estimated glomerular filtration rate; NA = Not applicable

Supplementary figure 1 Restricted cubic splines on the association between usual provider continuity index and cardiovascular diseases or mortality

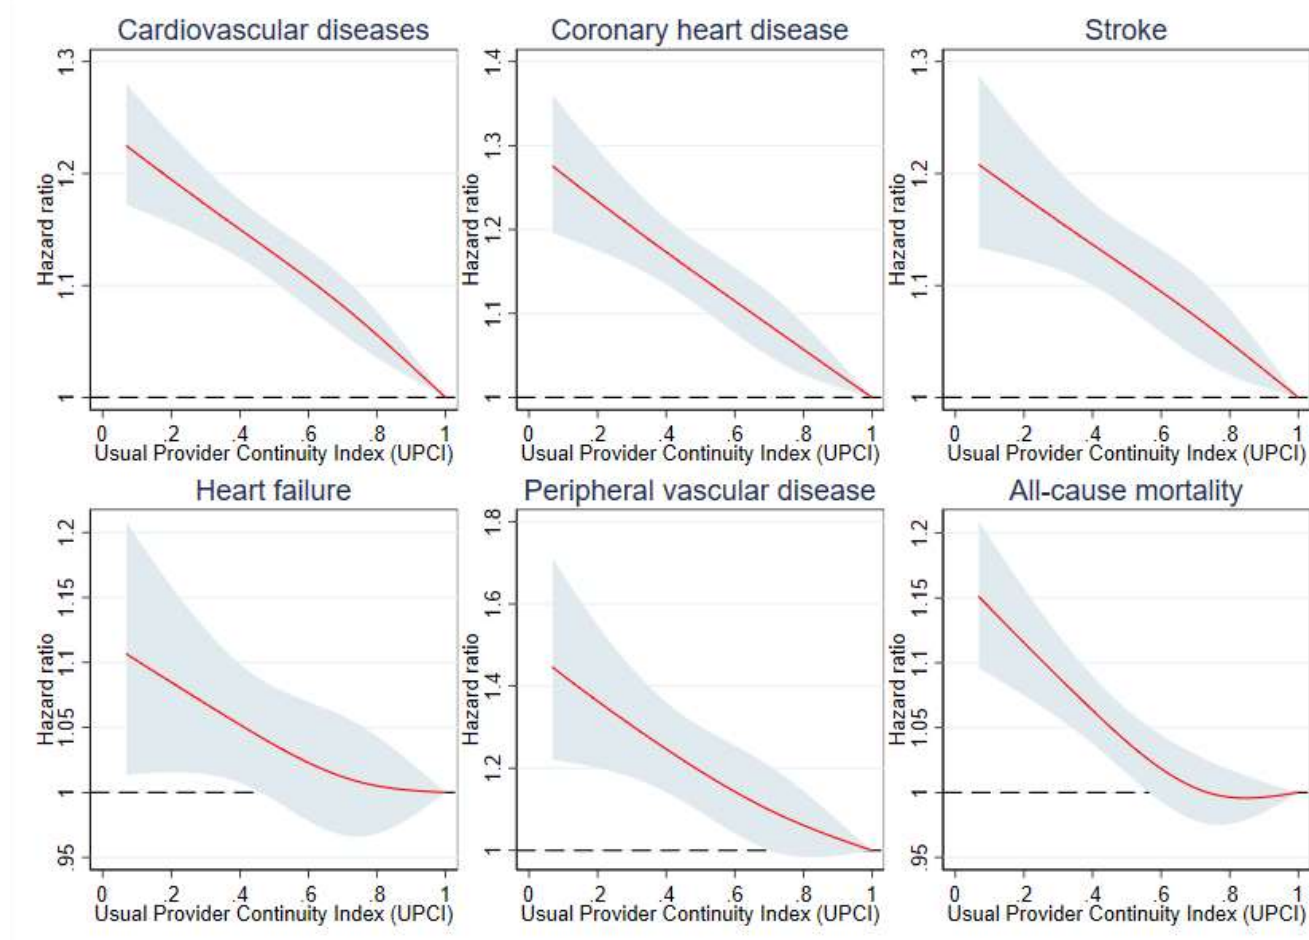

Regression was adjusted by age, sex, smoking status, systolic and diastolic blood pressure, body mass index, haemoglobin A1c, low-density lipoprotein cholesterol, estimated glomerular filtration rate, Charlson comorbidity index, number of attendances, use of anti-hypertensive drug, use of lipid-lowering drug and use of anti-diabetic drug at the baseline

Supplementary figure 2a. Sensitivity analyses on association of team-based continuity of care with CVD of patients with diabetes mellitus

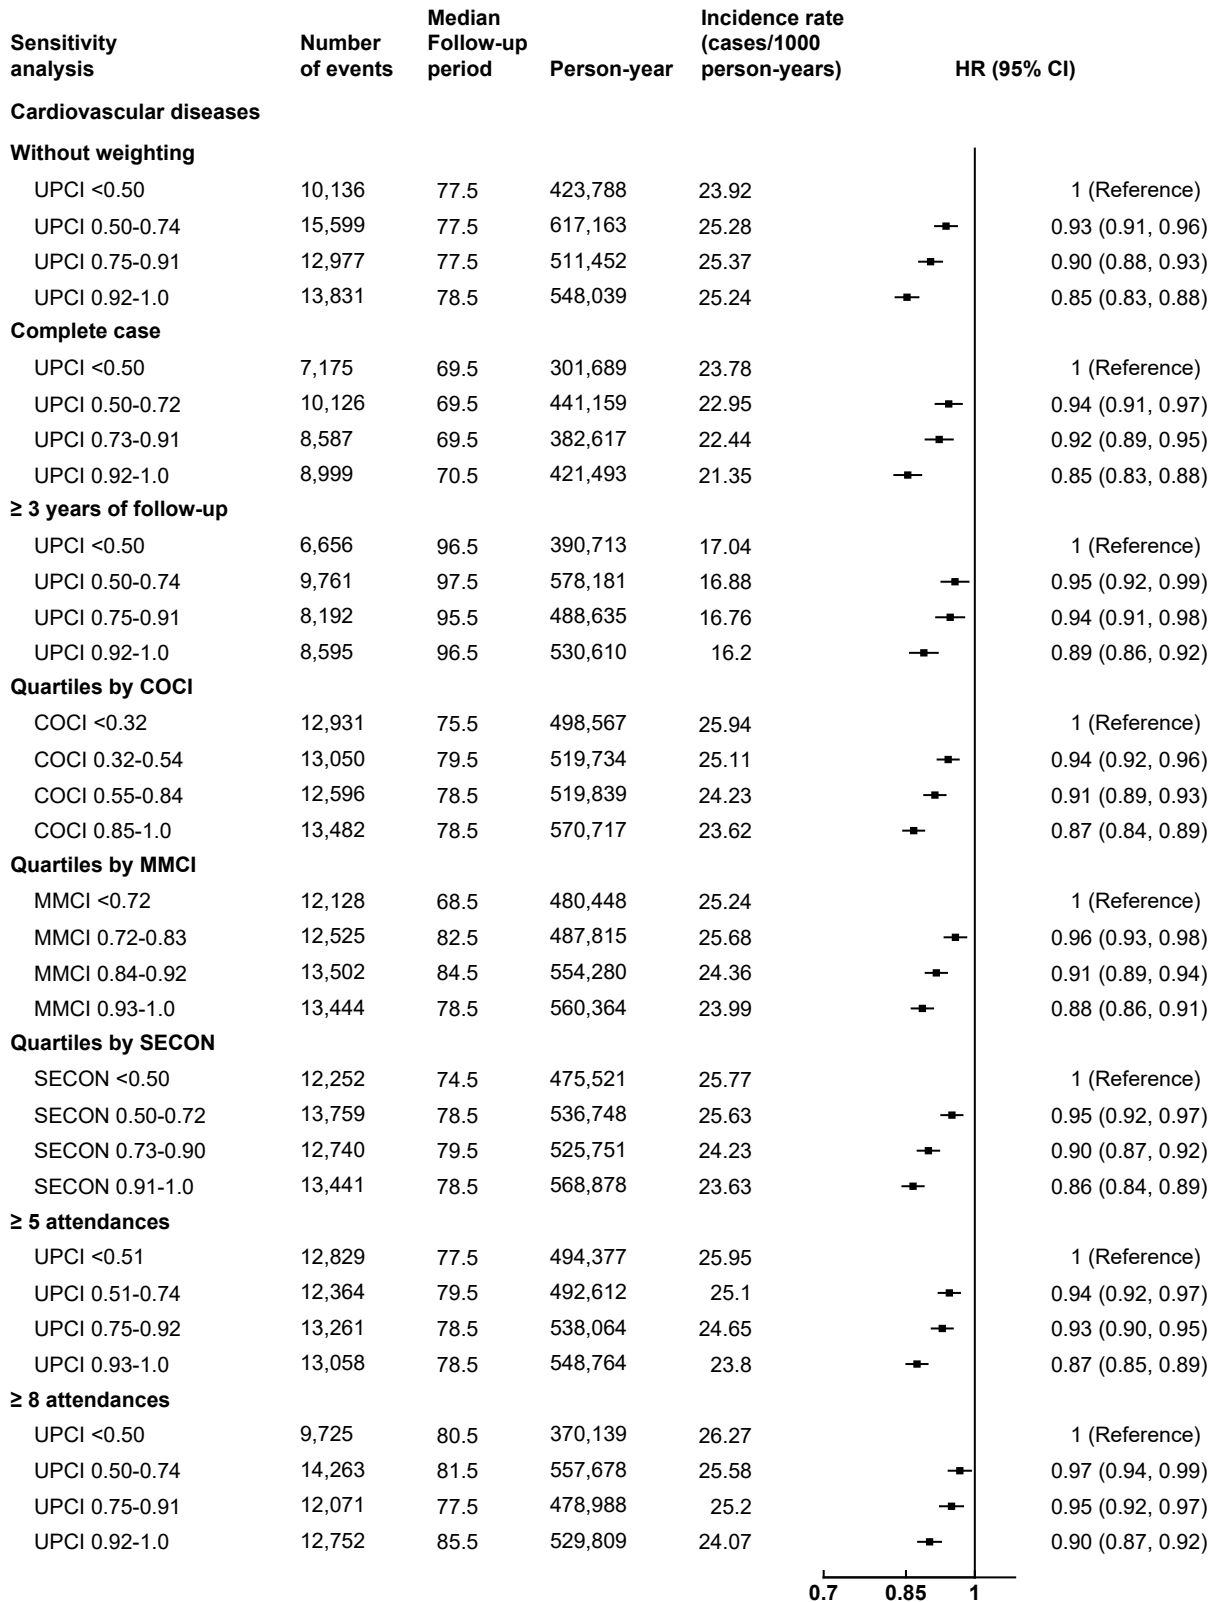

All cut-offs were based on quartiles of the sample. Hazard ratio was adjusted by age, sex, smoking status, systolic and diastolic blood pressure, body mass index, HbA1c, low-density lipoprotein cholesterol, estimated glomerular filtration rate, Charlson comorbidity index, number of attendances, use of anti-hypertensive drug, use of lipid-lowering drug and use of anti-diabetic drug at baseline.

CVD includes coronary heart disease, heart failure and stroke; HR = Hazard ratio; CVD = Cardiovascular diseases; HbA1c = Haemoglobin A1c; CI = Confidence interval; UPCI = Usual provider continuity index; COCI = Continuity of care index; MMCI = Modified modified continuity index; SECON = Sequential continuity index

Supplementary figure 2b. Sensitivity analyses on association of team-based continuity of care with CVD or all-cause mortality of patients with diabetes mellitus

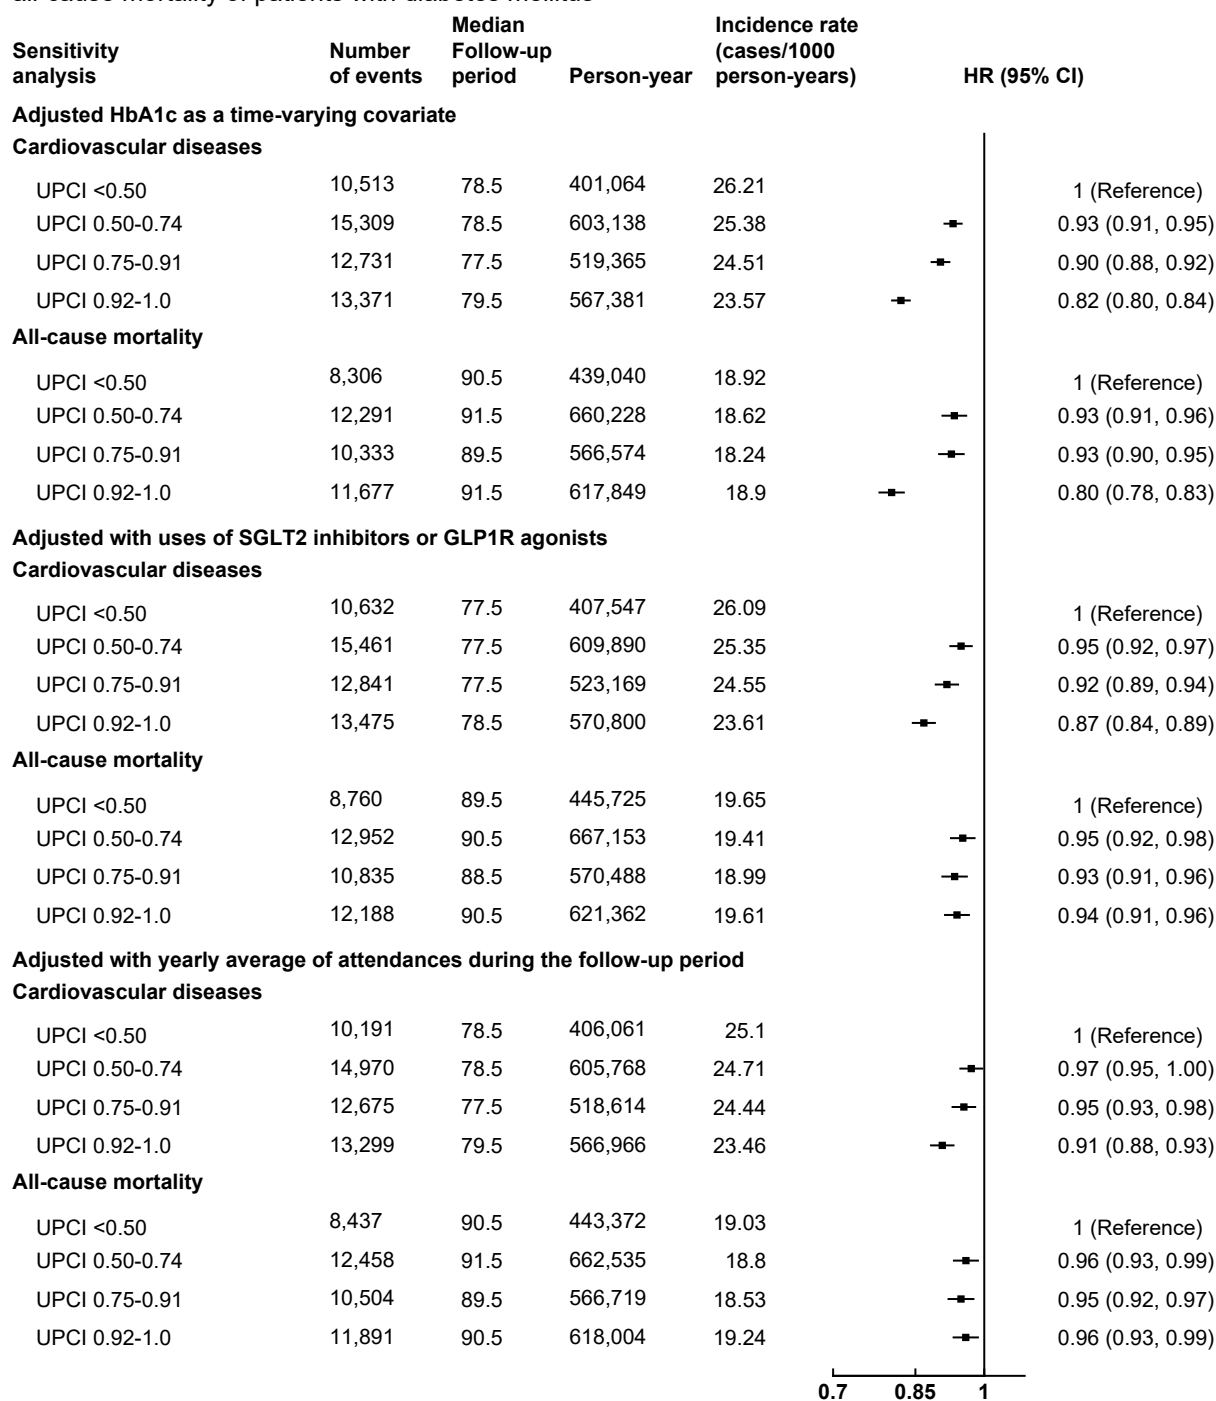

All cut-offs were based on quartiles of the sample. Hazard ratio was adjusted by age, sex, smoking status, systolic and diastolic blood pressure, body mass index, HbA1c, low-density lipoprotein cholesterol, estimated glomerular filtration rate, Charlson comorbidity index, number of attendances, use of anti-hypertensive drug, use of lipid-lowering drug and use of anti-diabetic drug at baseline.

CVD includes coronary heart disease, heart failure and stroke; HR = Hazard ratio; CVD = Cardiovascular diseases; HbA1c = Haemoglobin A1c; CI = Confidence interval; UPCI = Usual provider continuity index; SGLT2 = Sodium-glucose transport protein 2; GLP1R = Glucagon-like peptide-1 receptor

Supplementary figure 3 Kaplan-Meier survival curve of cardiovascular diseases for patients with diabetes mellitus by team-based usual provider continuity index quartiles

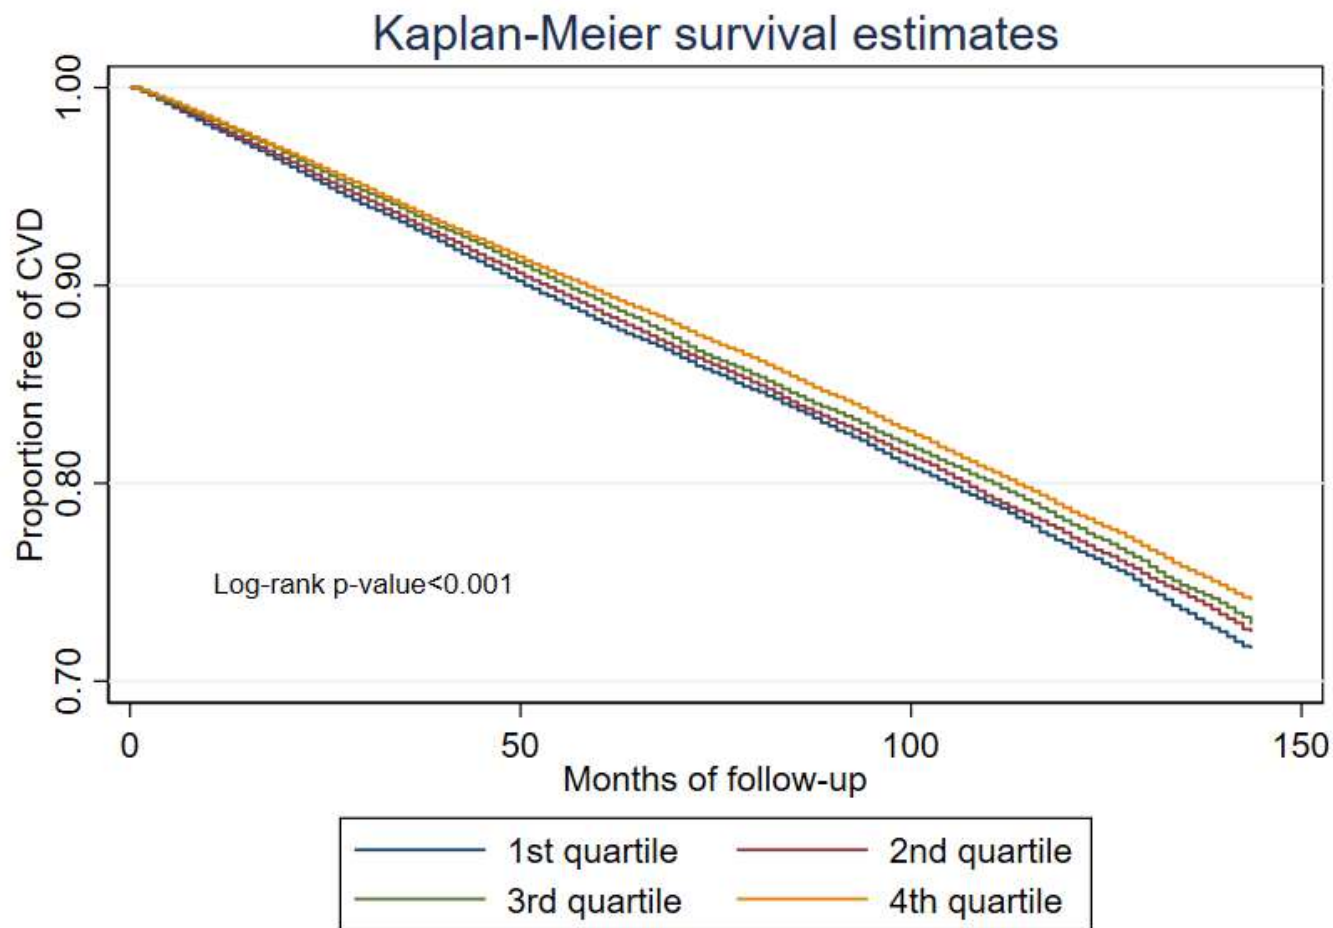

UPCI cut-offs of the quartiles were: <0.5; 0.5-0.74; 0.75-0.91; 0.92-1.0. CVD = Cardiovascular diseases; UPCI = Usual provider continuity index
